# Supplementary material for: Magnetically recyclable Bi/Fe-based hierarchical nanostructures via self-assembly for environmental decontamination
Source: Royal Society of Chemistry journal article supplement (doi:10.1039/c6nr03677e), 2016-01-01
Supplement: c6nr03677e1.pdf [file c6nr03677e1.pdf]

## 21 **Synthesis of nanostructured Bi<sub>2</sub>Fe<sub>4</sub>O<sub>9</sub> clusters (the precursor P-BFO):**

22 P-BFO with cuboid-like shape were prepared via combining low-temperature co-  
23 precipitation with hydrothermal treatment. Typically, Bi(NO<sub>3</sub>)<sub>3</sub>·5H<sub>2</sub>O (1.21 g) and  
24 Fe(NO<sub>3</sub>)<sub>3</sub>·9H<sub>2</sub>O (2.02 g) were completely dissolved in 2 mL of 2 M HNO<sub>3</sub> and citric acid (3.2  
25 g) was dissolved in 5 mL of water, respectively. A transparent solution could be obtained  
26 after mixing them together in a Teflon vessel. Then, 33 mL of 12 M NaOH was instantly  
27 added into the solution with vigorous stirring. After stirring for 1 h, the Teflon vessel  
28 containing the deep-brown slurry was transferred to an oil bath and heated at 95°C with  
29 constant stirring. After 12 h, the reaction was cooled down naturally to room temperature.  
30 The precipitate was collected and washed using water until pH ~10, followed by re-  
31 suspended into 6 mL of methanol/water (1:1 v/v) co-solvent by ultrasonication for 10 min.  
32 Thereafter, the suspended precipitate was surface-modified by addition of citric acid solution  
33 (0.6 g dissolved into 3.5 mL of the co-solvent) to promote its dispersion (noted as “A”). Then,  
34 3.82 g of urea was dissolved in 7 mL of the co-solvent at 65°C in water bath, which was then  
35 added slowly into the A with continuous stirring at room temperature. After 120 min, the  
36 dispersion was transferred into a 50-mL Teflon-lined stainless steel autoclave and heated at  
37 200°C for 20 min in an electric oven. After the autoclave reaction chamber was cooled down  
38 naturally to room temperature, the product was collected and washed thoroughly with water  
39 followed by absolute ethanol. This prepared material is stored in ethanol for further use.

40

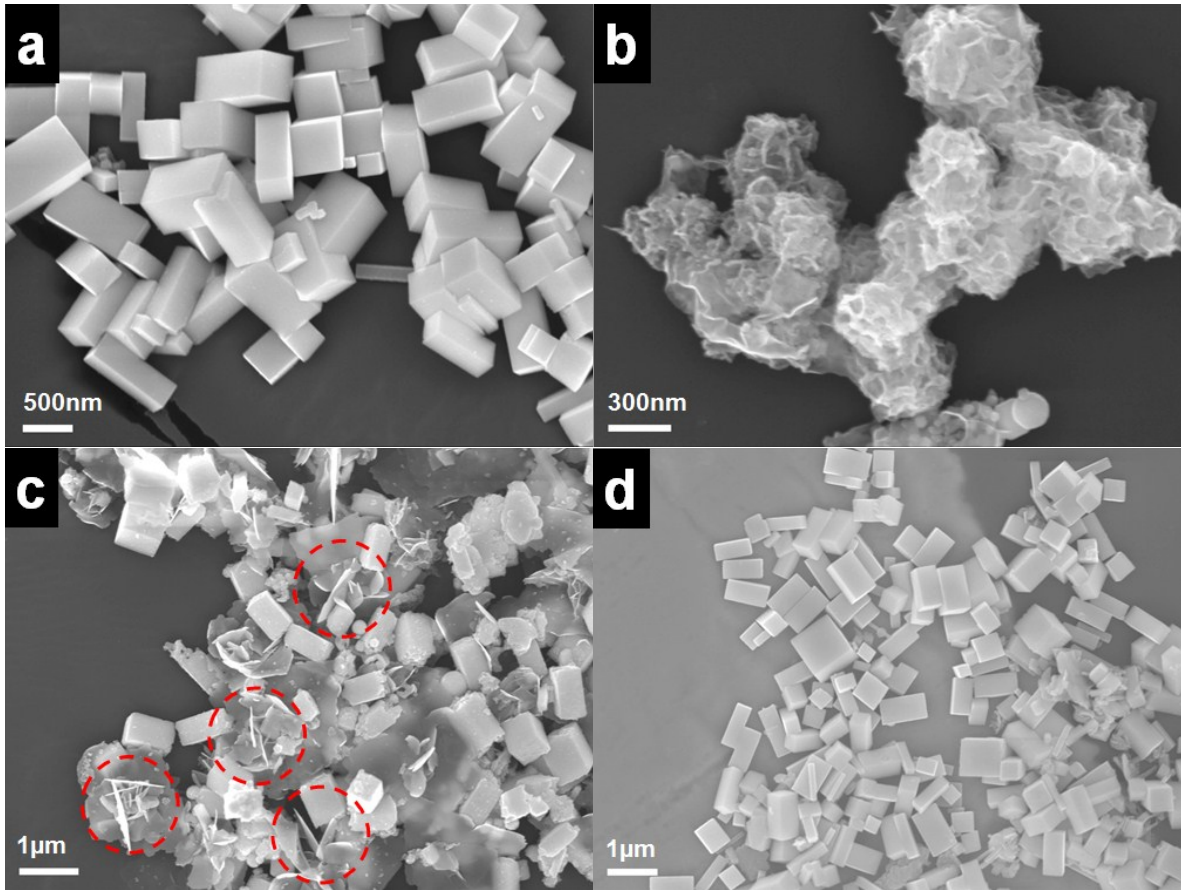

**Fig. S1.** FESEM images of as-prepared (a) BFO-A, (b) BFO-M, (c) BFO-E and (d) BFO-G.

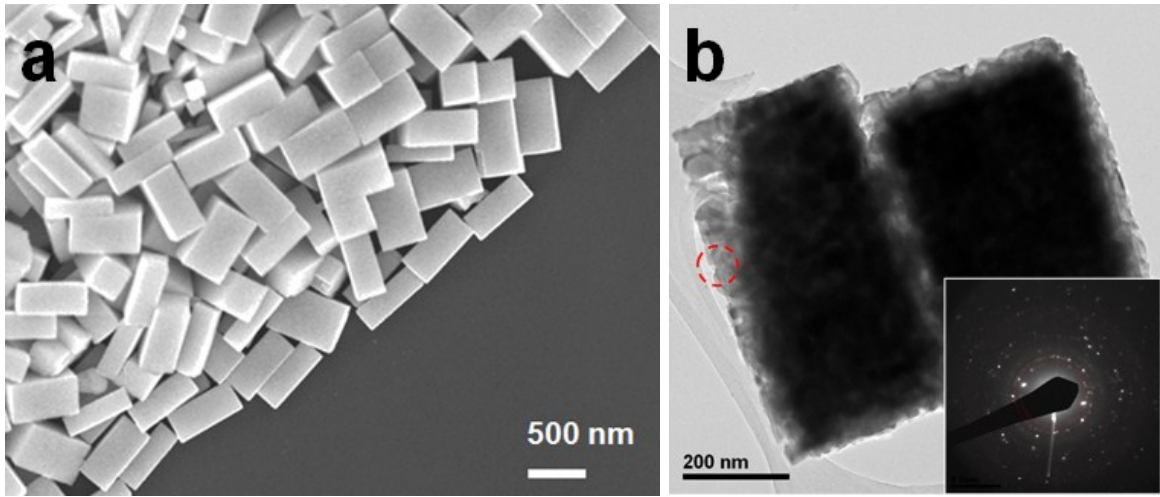

45

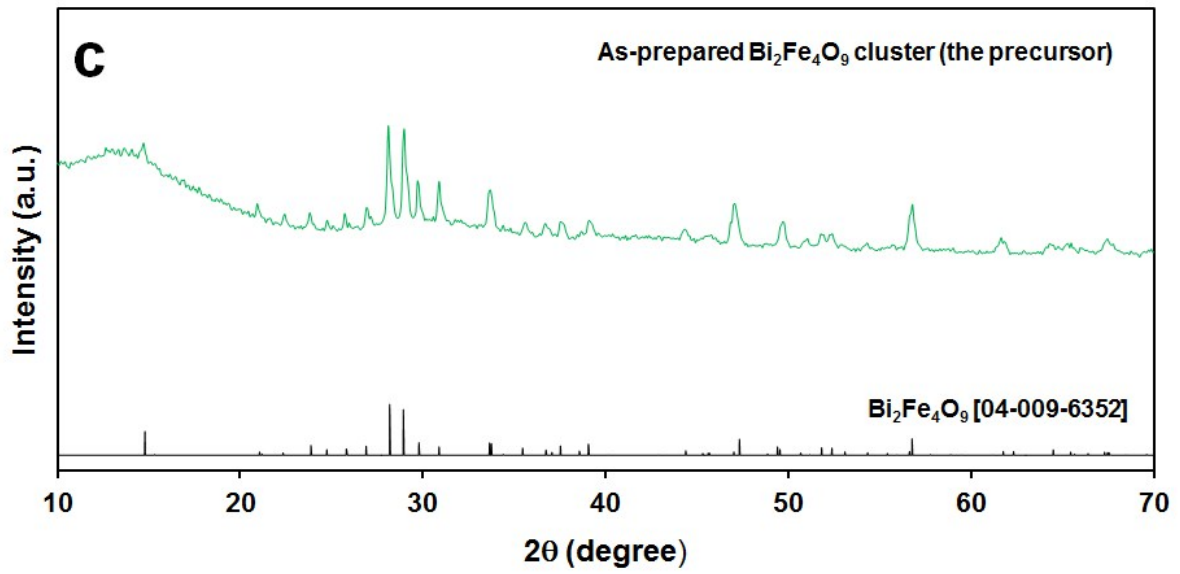

46

47

48 **Fig. S2.** (a) FESEM, (b) TEM and (c) XRD pattern of P-BFO.

49

50

51 Fig. S3 shows XRD patterns of the as-prepared BFO-M and the different standard  
 52 samples. The mainly observed characteristic peaks for BFO-M are numbered as 1 to 12. As  
 53 shown in the figure, the marked peak 1 could be ascribed to  $\text{Bi}_2\text{Fe}_4\text{O}_9$  or  $\text{Fe}_2\text{O}_3$ . The marked  
 54 peak 2 and 11 could be ascribed to  $\text{Bi}_2\text{Fe}_4\text{O}_9$  or  $\text{Bi}_{25}\text{FeO}_{40}$ . The marked peak 3 and 10 could  
 55 be ascribed to  $\text{Bi}_2\text{Fe}_4\text{O}_9$ ,  $\text{Fe}_2\text{O}_3$  or  $\text{Fe}_3\text{O}_4$ . The marked peak 4, 6 and 12 could be ascribed to  
 56  $\text{Bi}_2\text{Fe}_4\text{O}_9$ . The marked peak 5 could be ascribed to  $\text{BiFeO}_3$  or  $\text{Fe}_2\text{O}_3$ . The marked peak 7  
 57 could be ascribed to  $\text{BiFeO}_3$  or  $\text{Bi}_2\text{O}_3$ . The marked peak 8 could be ascribed to  $\text{Fe}_2\text{O}_3$ . The  
 58 marked peak 9 could be ascribed to  $\text{Bi}_2\text{Fe}_4\text{O}_9$ ,  $\text{BiFeO}_3$  or  $\text{Fe}_3\text{O}_4$ . Hence, it possibly indicates  
 59 that the fabricated BFO-M is a Bi/Fe-based mixed material.

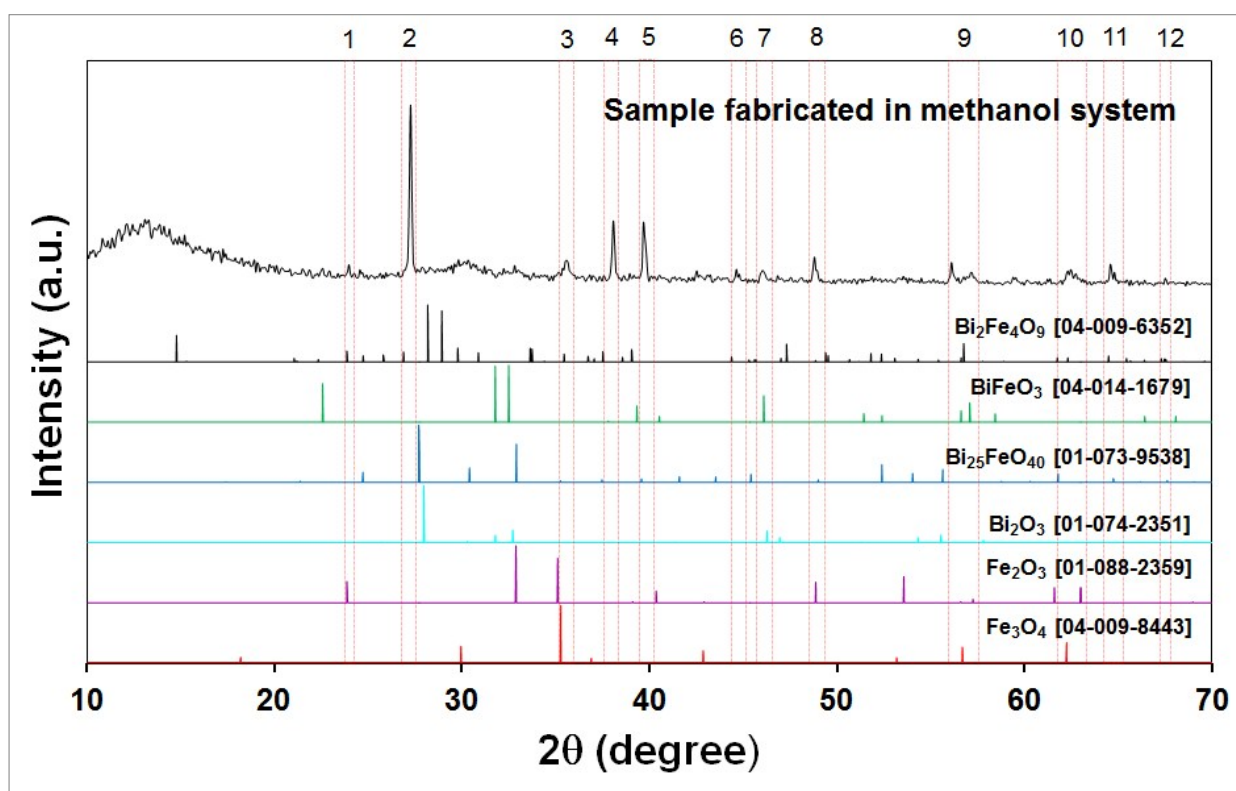

60  
 61  
 62  
 63  
 64  
 65  
 66  
 67  
 68  
 69

**Fig. S3.** Phase purity analysis of as-prepared BFO-M. The standard XRD patterns corresponding to mullite bismuth ferrite ( $\text{Bi}_2\text{Fe}_4\text{O}_9$ ), perovskite bismuth ferrite ( $\text{BiFeO}_3$ ), sillenite bismuth ferrite ( $\text{Bi}_{25}\text{FeO}_{40}$ ), bismuth oxide ( $\text{Bi}_2\text{O}_3$ ), hematite iron oxide ( $\text{Fe}_2\text{O}_3$ ) and magnetite iron oxide ( $\text{Fe}_3\text{O}_4$ ).

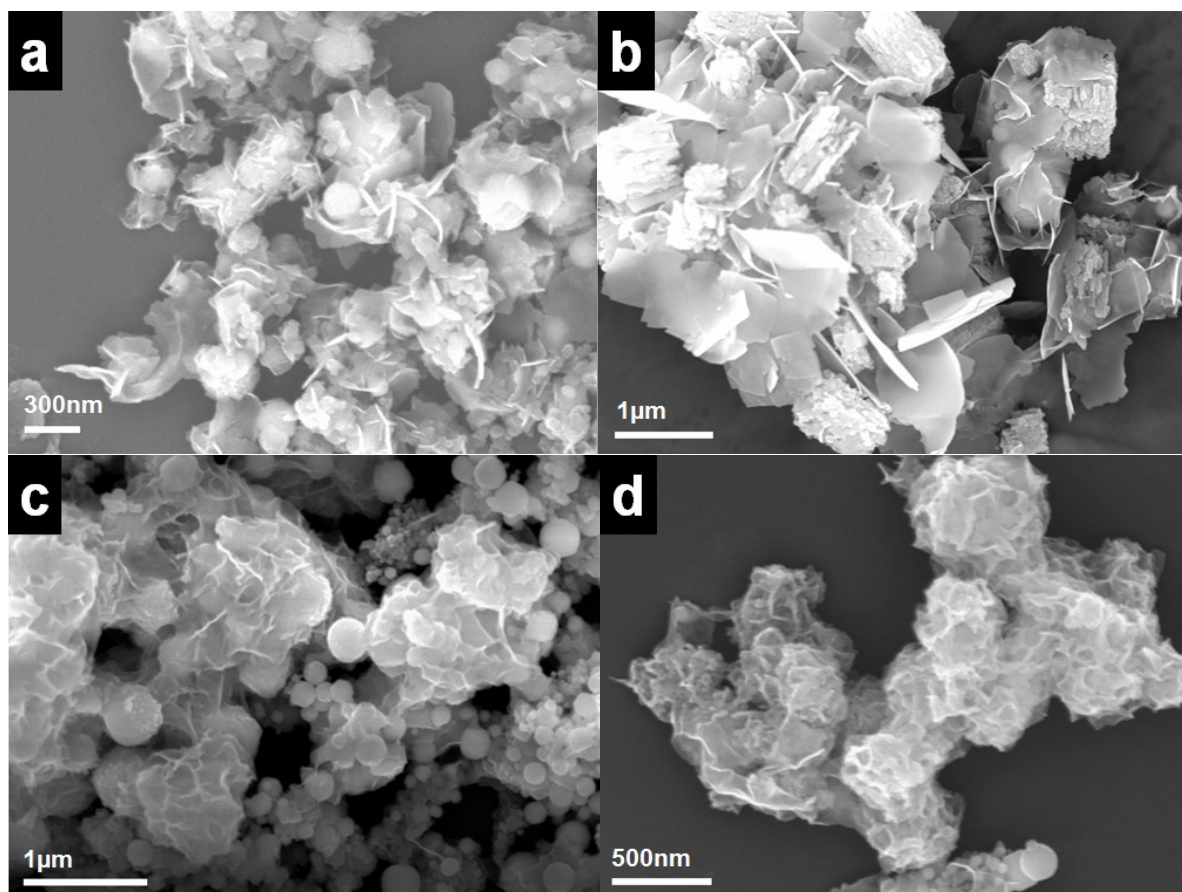

70

71

72

73 **Fig. S4.** FESEM images of products obtained via solvothermal treatment in (a) 2 mL, (b) 5  
74 mL, (c) 7.5 mL, (d) 10 mL methanol. (Note: the P-BFO loading is 50 mg; the reaction  
75 temperature is 200°C; the reaction time is 3 d.)

76



77 As shown in Fig. S5, under keeping other conditions (i.e., 10 mL volume reaction and 3  
78 d reaction time), the precursor P-BFO (Fig. S2a) could still be its morphology after  
79 undergoing solvothermal treatment in methanol system at temperatures of up to 150°C (Fig.  
80 S5a, b), whereas the morphology for the final product could be changed to coral-like shape at  
81 temperature of 200°C (Fig. S5c). If further increased reaction temperature, the final product  
82 could be sphere-like shape (Fig. S5d).

83

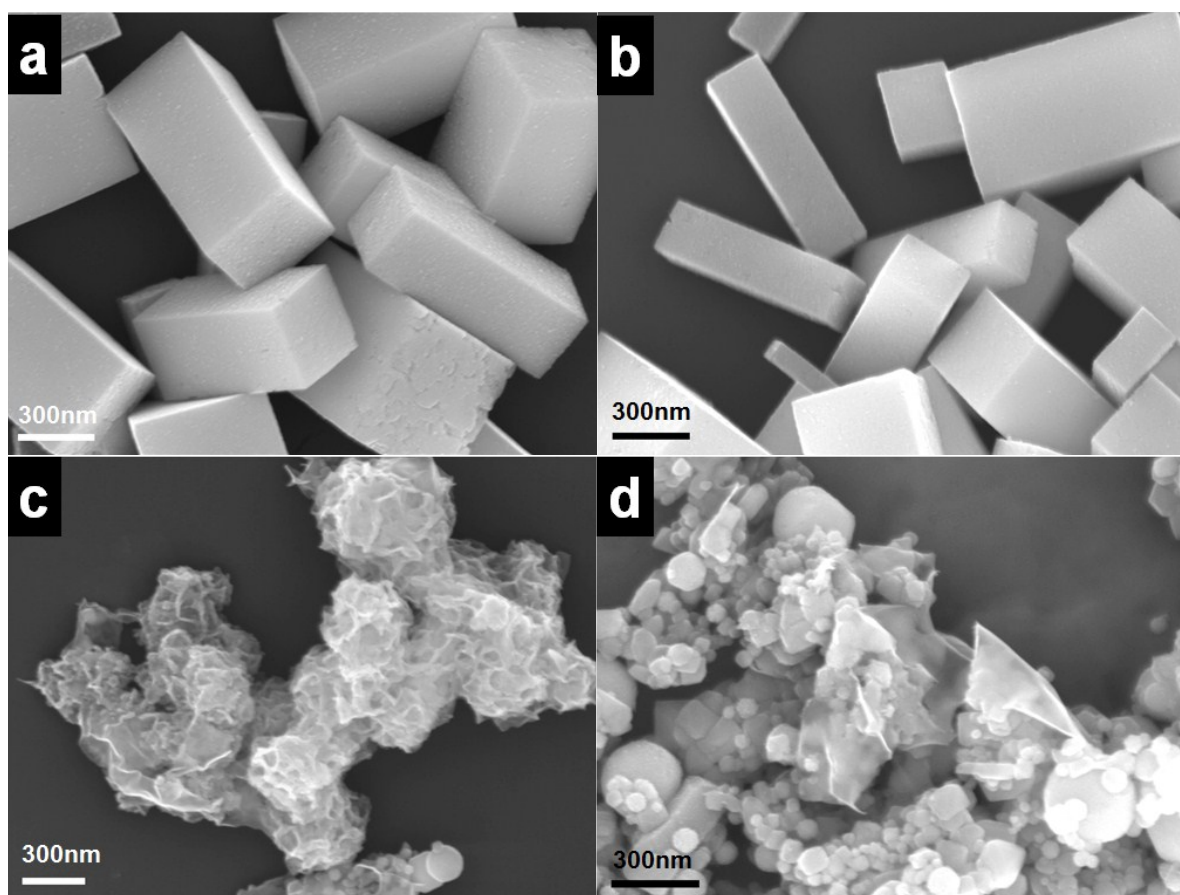

87 **Fig. S5.** FESEM images of products obtained via methanol solvothermal treatment at reaction  
88 temperature of (a) 90°C, (b) 150°C, (c) 200°C, (d) 220°C. (Note: the P-BFO loading is 50 mg;  
89 the volume of methanol is 10 mL; the reaction time is 3 d.)

90

91

92 As shown in Fig. S6, under keeping other conditions (i.e., 10 mL volume reaction and  
93 200°C reaction temperature), the final product is composed of incompletely dissolved  
94 precursors (Fig. S6a) with new generation of coral-like shape (Fig. S6a, inset) when the  
95 reaction time is 1 d. With the extension of reaction time to 3 d, a product with coral-like  
96 hierarchical morphology could be fabricated (Fig. S6b). If further prolonged reaction time to  
97 6 d, the resultant product contains sphere-like particles with no noticeable hierarchical  
98 structure.

99

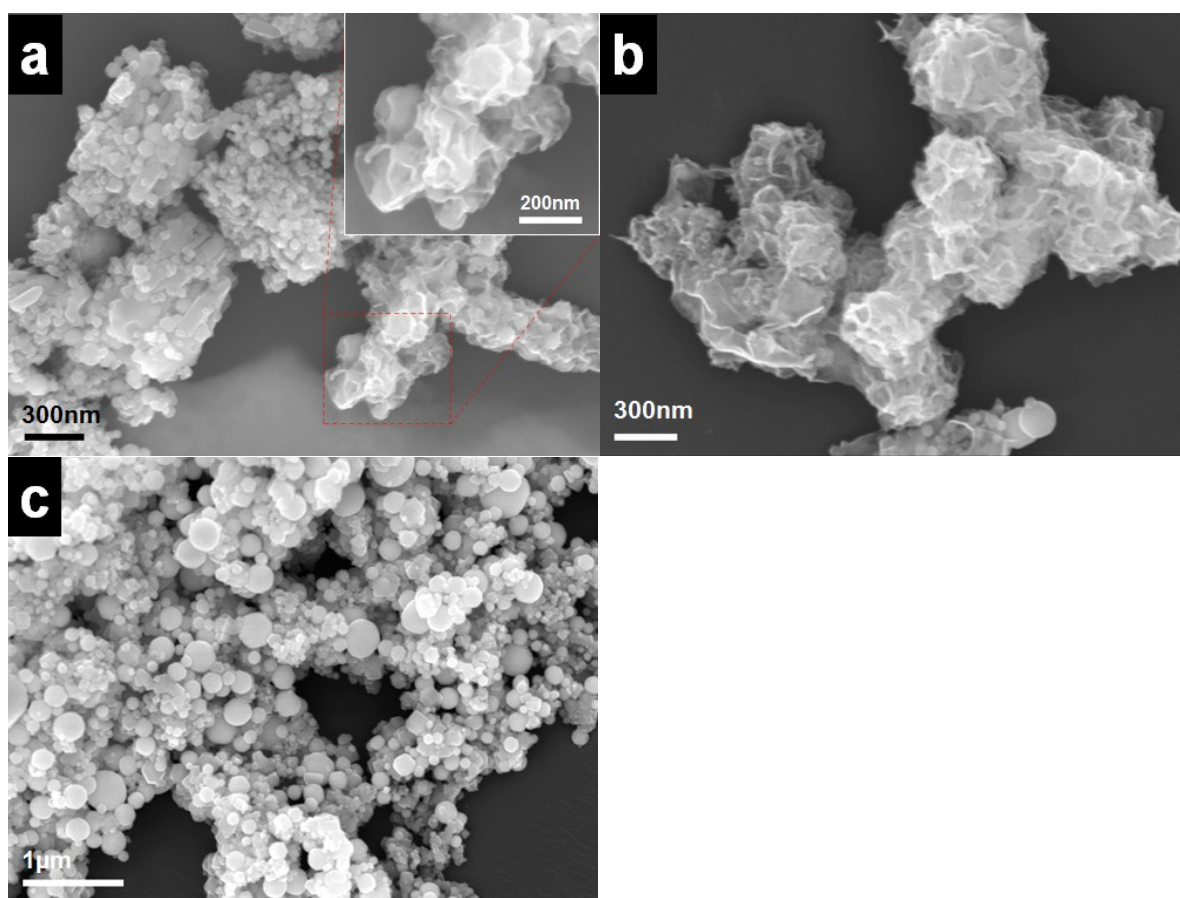

101

102

103 **Fig. S6.** FESEM images of products obtained via methanol solvothermal treatment at reaction  
104 time of (a) 1 d, (b) 3 d, (c) 6 d. (Note: the P-BFO loading is 50 mg; the volume of methanol is  
105 10 mL; the reaction temperature is 200°C.)

106



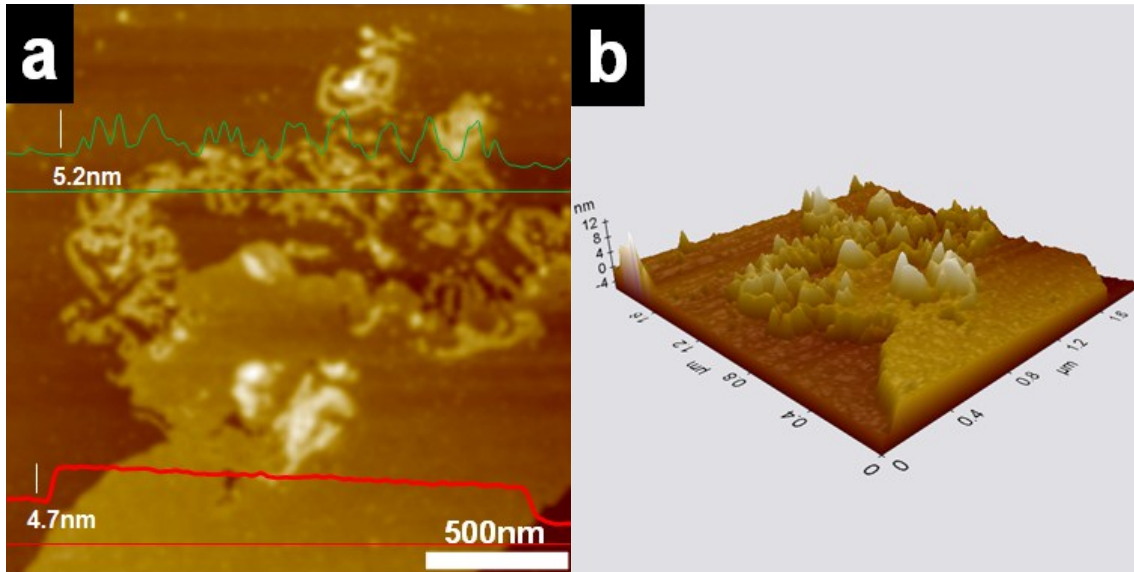

107

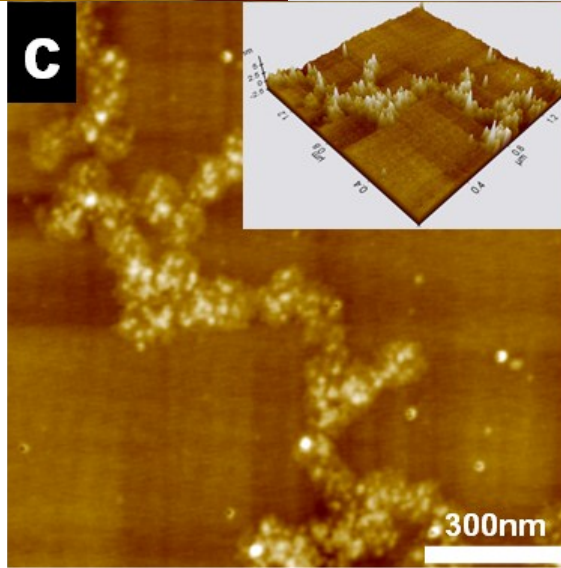

108

109 **Fig. S7.** AFM images of as-prepared BFO-M. (a) 2D AFM image with two line scans, (b) 3D  
 110 AFM image, (c) 2D AFM image of local magnification and the corresponding 3D AFM  
 111 image.

112

113

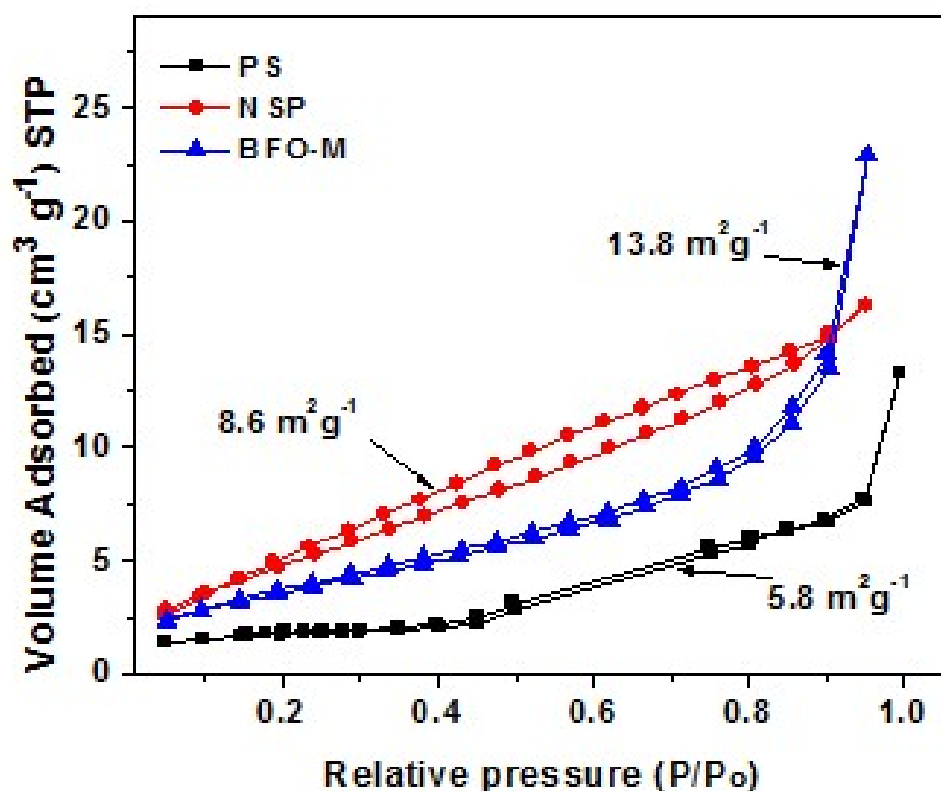

114  
 115 **Fig. S8.** Nitrogen adsorption/desorption isotherms of as-prepared BFO-M, NSP and PS.  
 116 (Note: PS is a pad-like single crystalline Bi<sub>2</sub>Fe<sub>4</sub>O<sub>9</sub>; NSP is a plate-like nanostructured  
 117 Bi<sub>2</sub>Fe<sub>4</sub>O<sub>9</sub> cluster; BFO-M is a coral-like product synthesized from Bi<sub>2</sub>Fe<sub>4</sub>O<sub>9</sub> precursor.)  
 118

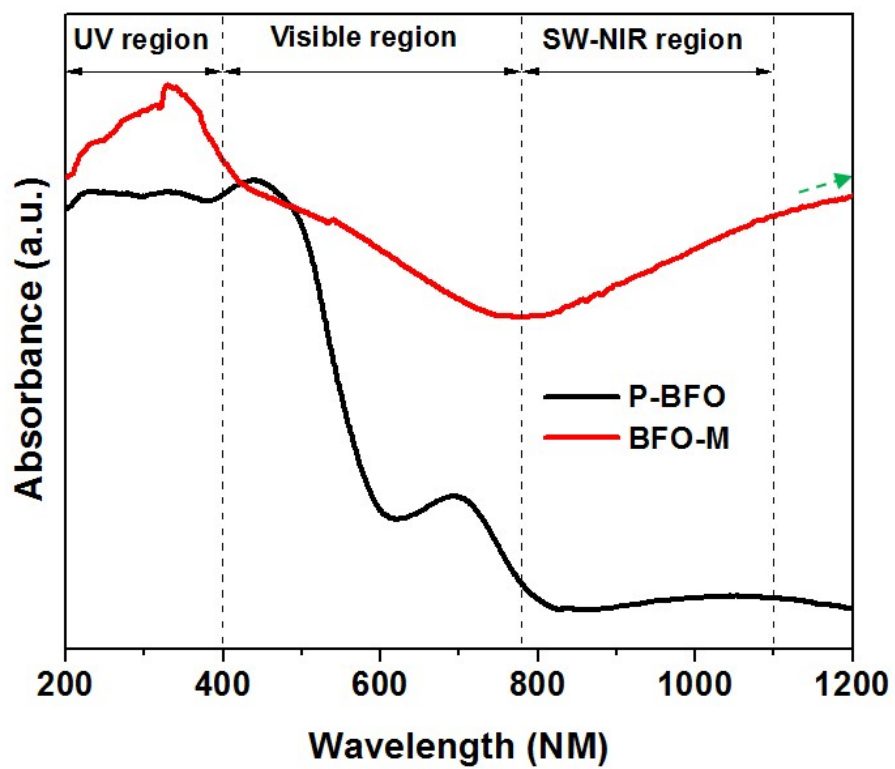

119  
120 **Fig. S9.** UV-vis and short-wavelength near-infrared absorption spectrum of as-prepared  
121 BFO-M and P-BFO.  
122  
123

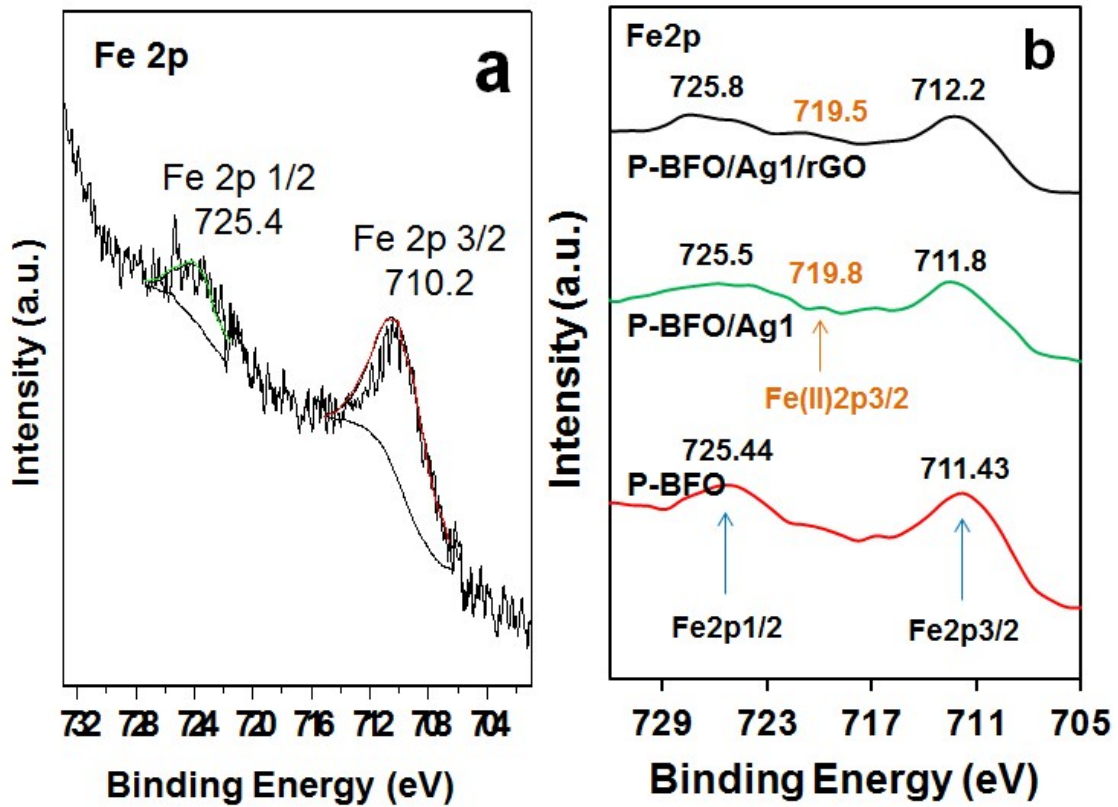

125

126

127 **Fig. S10.** (a) High-resolution XPS spectrum of Fe 2p for BFO-M. (b) High-resolution XPS  
 128 spectrum of Fe 2p for P-BFO shown as red curve (quoted from our published report  
 129 previously<sup>1</sup>).

130

131 Herein, the re-used BFO-M on the removal of IPU was recovered by magnetic separation and  
 132 rinsed with DI water thoroughly, while the adsorption of IPU on BFO-M in the dark (~3.5%)  
 133 was neglected. Moreover, the re-used BFO-M on the removal of Pb(II) was recovered by  
 134 magnetic separation and washed with dilute acid solution (HNO<sub>3</sub> at pH ~4.5) and DI water  
 135 thoroughly.

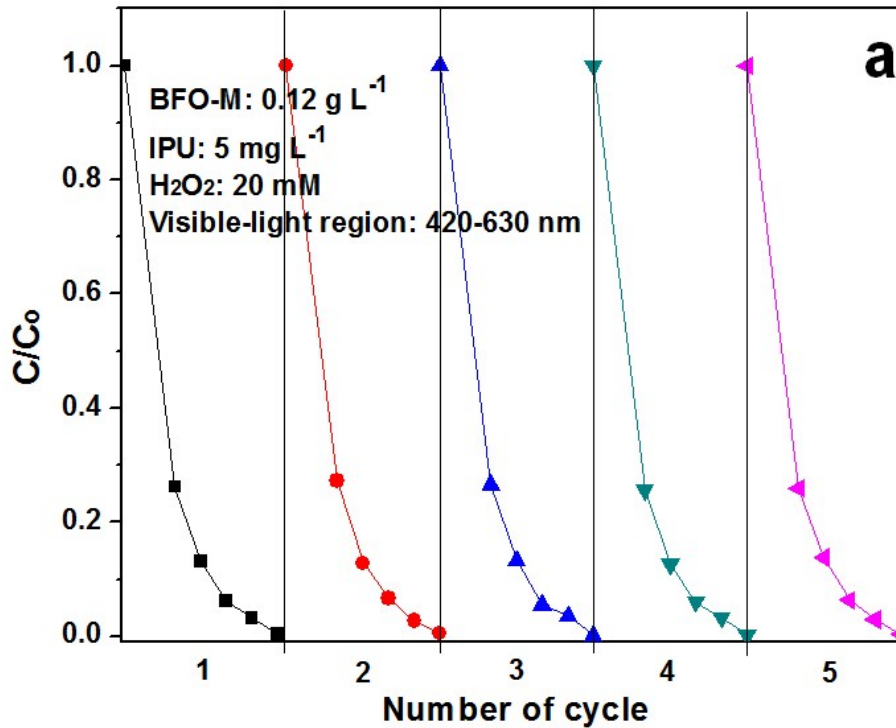

136

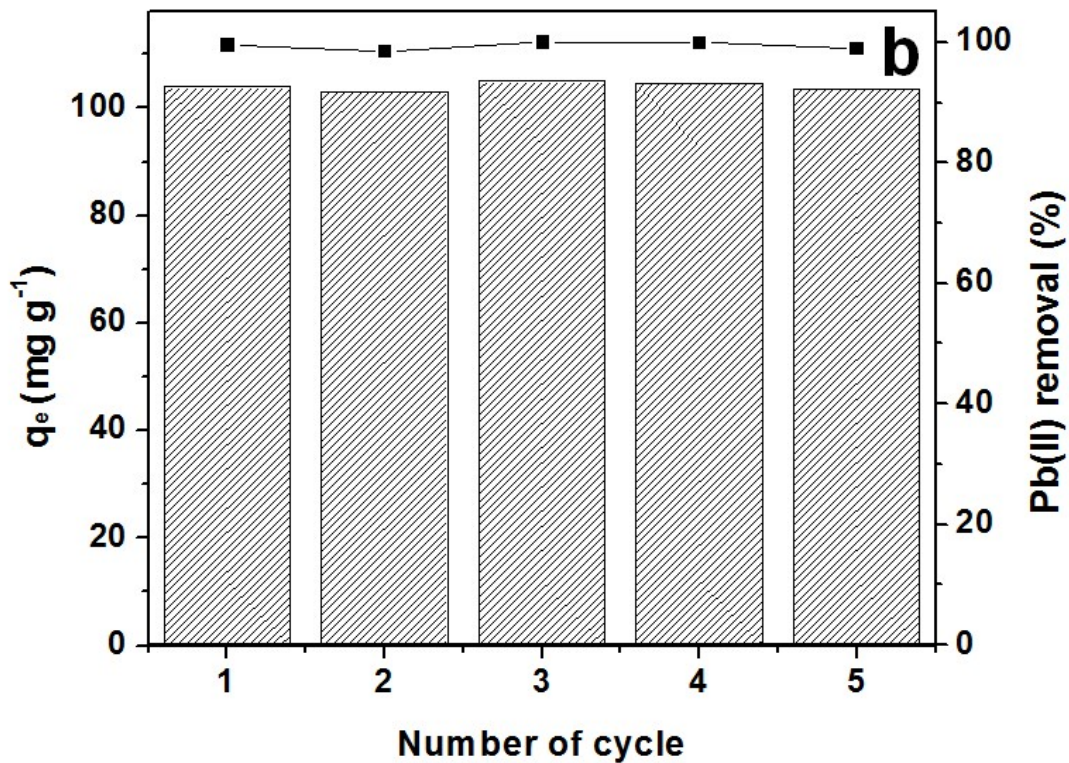

137

138 **Fig. S11.** Efficiency of reused BFO-M on removal of IPU using visible light photo-Fenton  
 139 oxidation (a), and Pb(II) at the condition of 50 mg L<sup>-1</sup> initial metal concentration, 0.5 g L<sup>-1</sup>  
 140 BFO-M (b).

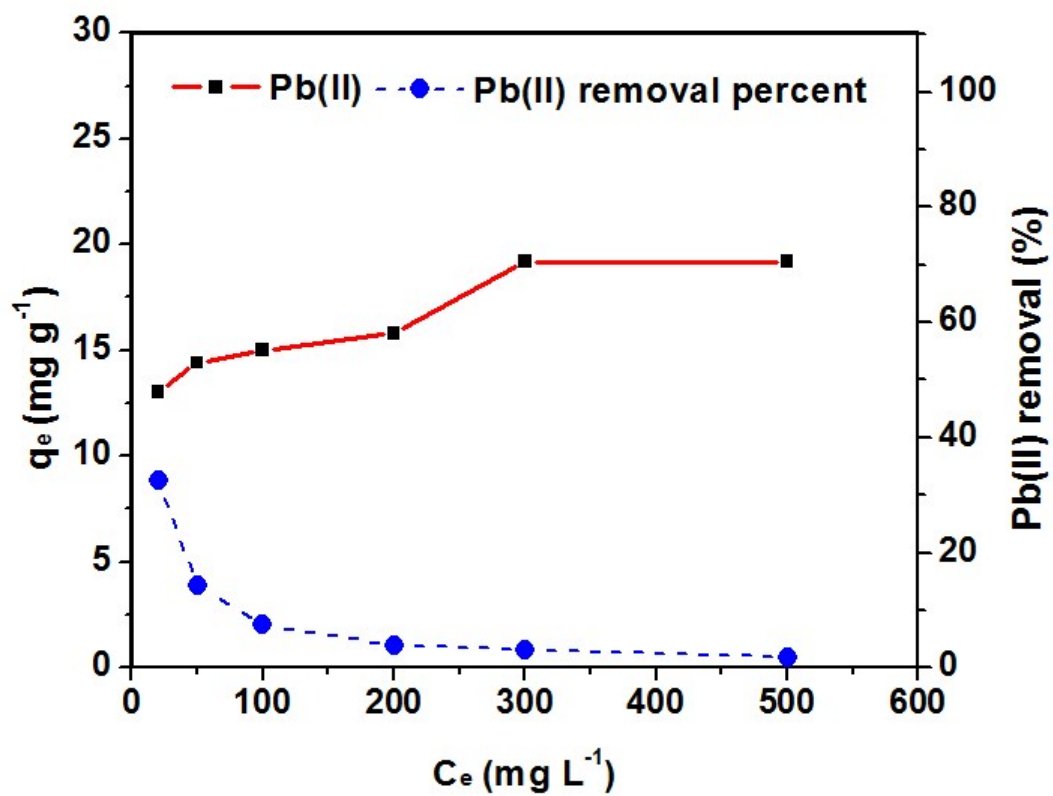

142  
 143 **Fig. S12.** Adsorption of P-BFO on Pb(II) at different concentrations of Pb(II) (20, 50, 100,  
 144 200, 300 and 500 mg L<sup>-1</sup>) and the corresponding percentage removal of Pb(II).  
 145



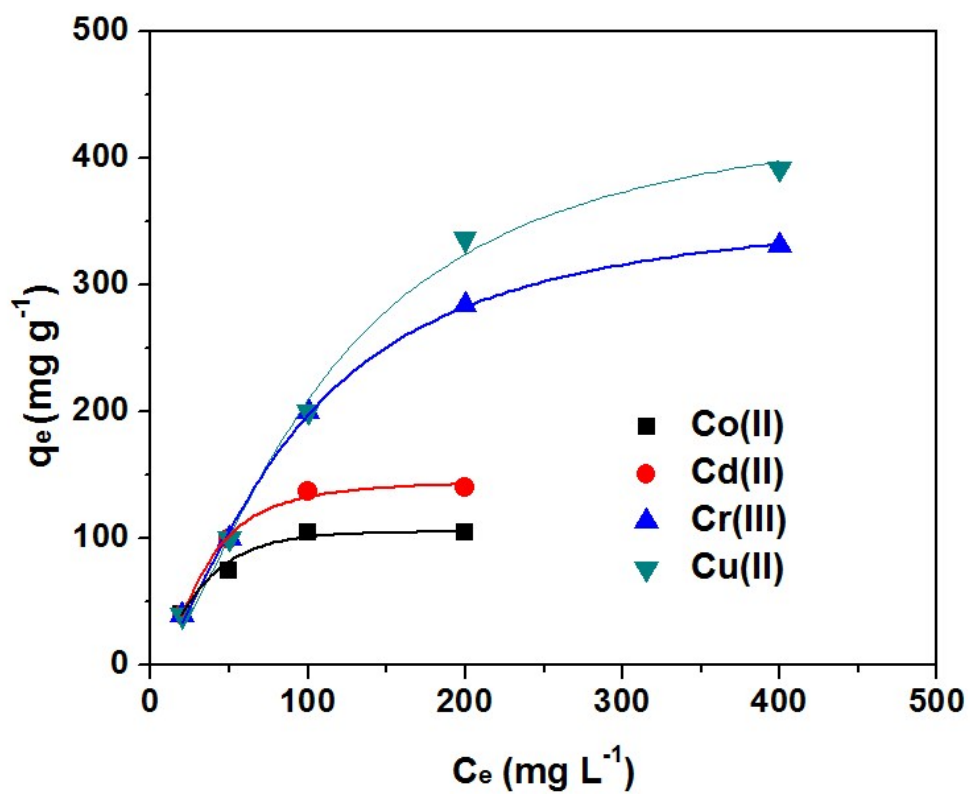

146

147

148 **Fig. S13.** Langmuir isotherm of metal ions (e.g., Cu(II), Cr(III), Cd(II), Co(II)) for BFO-M  
 149 adsorption and the corresponding maximal adsorption capacities are 448, 366, 146 and 107  
 150 mg g<sup>-1</sup> respectively.

151 **Table S1** Physiochemical properties of investigated pollutants.

| Pollutant             | Type           | Chemical structure                                                                 | Chemical formula                                                  | Molar mass (g mol <sup>-1</sup> ) | Solubility in water (mg L <sup>-1</sup> ) | LD <sub>50</sub> (mg kg <sup>-1</sup> , rat, oral) |
|-----------------------|----------------|------------------------------------------------------------------------------------|-------------------------------------------------------------------|-----------------------------------|-------------------------------------------|----------------------------------------------------|
| Methyl orange (MO)    | Dye            | 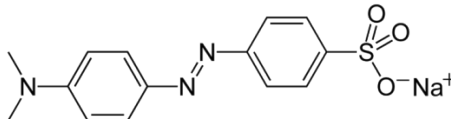 | C <sub>14</sub> H <sub>14</sub> N <sub>3</sub> NaO <sub>3</sub> S | 327.33                            | 5000                                      | 60                                                 |
| 5-Fluorouracil (5-FU) | Pharmaceutical |  | C <sub>4</sub> H <sub>3</sub> FN <sub>2</sub> O <sub>2</sub>      | 130.08                            | 12000                                     | 230                                                |
| Isoproturon (IPU)     | Pesticide      |  | C <sub>12</sub> H <sub>18</sub> N <sub>2</sub> O                  | 206.29                            | 72                                        | 1830                                               |

152
